# Supplementary figures and images for: Exploring the Interplay of RUNX2 and CXCR4 in Melanoma Progression
Source: MDPI journal article supplement (doi:10.3390/cells13050408), 2024-02-27

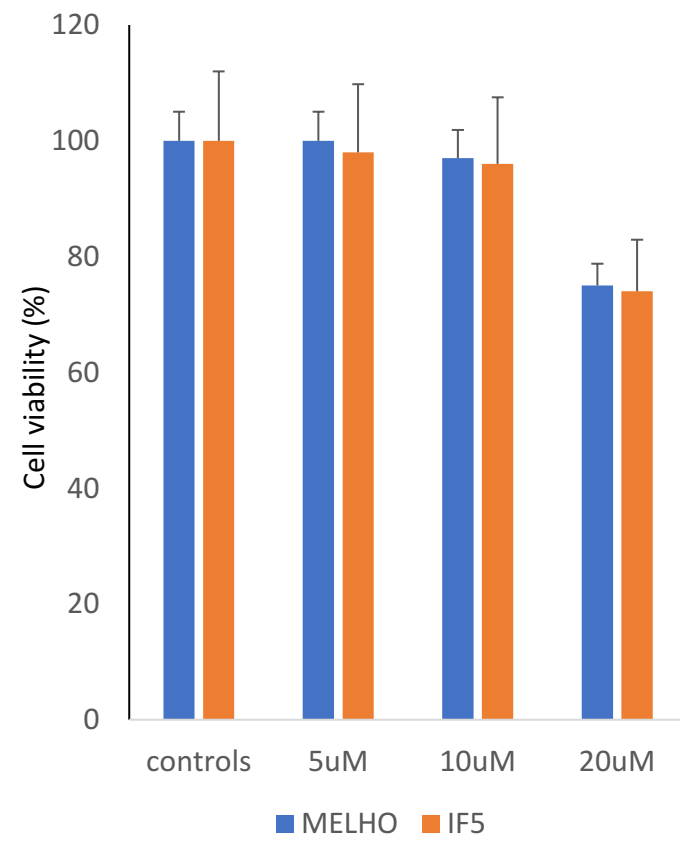

Supplement: s1 [file s1]
